# Supplementary material for: Real-world pharmacokinetics of ramucirumab in combination with erlotinib and docetaxel for advanced non-small cell lung cancer: a prospective cohort study
Source: Research Square preprint supplement (doi:10.21203/rs.3.rs-8482971/v1), 2026-01-08
Supplement: Supplementary file 1 [file 571fcf3e99bc67302ca0b6e7.docx]

Table S1 Characteristics of patients by ramucirumab concentration in the docetaxel group

| **Characteristic** | **Q2-4**  N = 11 | **Q1**  N = 4 |
| --- | --- | --- |
| Age (years) | 64(47-79) | 68(60-74) |
| Sex |  |  |
| male | 6 (54.5%) | 4 (100.0%) |
| female | 5 (45.5%) | 0 (0.0%) |
| BH (cm) | 161.0(±8.6) | 166.1(±8.3) |
| BW (kg) | 63.0(±11.6) | 66.7(±6.8) |
| BSA (m2) | 1.66(±0.16) | 1.74(±0.05) |
| BMI (kg/m2) | 24.3(±4.5) | 24.4(±4.3) |
| Stage |  |  |
| IIIA | 0 (0.0%) | 1 (25.0%) |
| IIIB | 1 (9.1%) | 1 (25.0%) |
| IV | 7 (63.6%) | 2 (50.0%) |
| rec | 3 (27.3%) | 0 (0.0%) |
| Tumor histology |  |  |
| ad | 9 (81.8%) | 3 (75.0%) |
| sq | 0 (0.0%) | 1 (25.0%) |
| pleo | 1 (9.1%) | 0 (0.0%) |
| NOS | 1 (9.1%) | 0 (0.0%) |
| Smoking history | 5 (45.5%) | 4 (100.0%) |
| EGFR mutation |  |  |
| WT | 4 (36.4%) | 3 (75.0%) |
| del19 | 6 (54.5%) | 0 (0.0%) |
| L858R | 0 (0.0%) | 0 (0.0%) |
| ins20 | 1 (9.1%) | 0 (0.0%) |
| unknown | 0 (0.0%) | 1 (25.0%) |
| PDL1 TPS (%) |  |  |
| ≥50 | 3 (27.3%) | 2 (50.0%) |
| 1-49 | 2 (18.2%) | 1 (25.0%) |
| <1 | 5 (45.5%) | 0 (0.0%) |
| unknown | 1 (9.1%) | 1 (25.0%) |
| ECOG PS |  |  |
| 0 | 4 (36.4%) | 1 (25.0%) |
| 1 | 6 (54.5%) | 3 (75.0%) |
| 2 | 1 (9.1%) | 0 (0.0%) |
| Prior treatment courses |  |  |
| <2 | 3 (27.3%) | 1 (25.0%) |
| ≥2 | 8 (72.7%) | 3 (75.0%) |
| Prior ICI | 3 (27.3%) | 4 (100.0%) |
| Prior anti-VEGF/VEGFR | 3 (27.3%) | 0 (0.0%) |
| Prior EGFR-TKI | 6 (54.5%) | 0 (0.0%) |
| Prior taxane | 5 (45.5%) | 3 (75.0%) |
| Prior response |  |  |
| PR | 4 (36.4%) | 3 (75.0%) |
| SD | 3 (27.3%) | 1 (25.0%) |
| PD | 4 (36.4%) | 0 (0.0%) |
| NE | 0 (0.0%) | 0 (0.0%) |
| RAM infusions |  |  |
| ≤2 | 4 (36.4%) | 3 (75.0%) |
| ≥3 | 7 (63.6%) | 1 (25.0%) |
| Pleural effusion | 4 (36.4%) | 1 (25.0%) |
| Edema | 5 (45.5%) | 0 (0.0%) |
| Proteinuria | 4 (36.4%) | 1 (25.0%) |
| Albumin (g/dl) | 3.72(±0.38) | 3.98(±0.46) |
| C reactive protein (mg/dl) | 0.37(0.12-7.53) | 0.57(0.25-3.17) |
| Modified Glasgow prognostic score |  |  |
| 0 | 4 (36.4%) | 2 (50.0%) |
| 1 | 6 (54.5%) | 1 (25.0%) |
| 2 | 1 (9.1%) | 1 (25.0%) |
| Cachexia | 1 (9.1%) | 1 (25.0%) |
|  | | |

Table S2 Characteristics of patients by ramucirumab concentration in the erlotinib group

| **Characteristic** | **Q2-4** N = 6 | **Q1** N = 2 |
| --- | --- | --- |
| Age (years) | 76(69-83) | 65(59-71) |
| Sex |  |  |
| male | 2 (33.3%) | 2 (100.0%) |
| female | 4 (66.7%) | 0 (0.0%) |
| BH (cm) | 157.6 (±8.1) | 169.0 (±8.5) |
| BW (kg) | 54.6 (±12.8) | 69.6 (±13.8) |
| BSA (m2) | 1.54 (±0.19) | 1.79 (±0.09) |
| BMI (kg/m2) | 21.8 (±3.4) | 24.7 (±7.3) |
| Stage |  |  |
| IV | 2 (33.3%) | 2 (100.0%) |
| rec | 4 (66.7%) | 0 (0.0%) |
| Tumor histology |  |  |
| ad | 6 (100.0%) | 2 (100.0%) |
| Smoking history | 3 (50.0%) | 2 (100.0%) |
| EGFR mutation |  |  |
| del19 | 2 (33.3%) | 1 (50.0%) |
| L858R | 4 (66.7%) | 1 (50.0%) |
| PDL1 TPS (%) |  |  |
| <1 | 1 (16.7%) | 1 (50.0%) |
| ≥50 | 0 (0.0%) | 1 (50.0%) |
| 1-49 | 4 (66.7%) | 0 (0.0%) |
| unknown | 1 (16.7%) | 0 (0.0%) |
| ECOG PS | 3 (50.0%) | 2 (100.0%) |
| Prior treatment courses |  |  |
| <2 | 4 (66.7%) | 2 (100.0%) |
| ≥2 | 2 (33.3%) | 0 (0.0%) |
| Prior ICI |  |  |
| 0 | 6 (100.0%) | 2 (100.0%) |
| Prior anti-VEGF/VEGFR | 1 (16.7%) | 0 (0.0%) |
| Prior EGFR-TKI | 3 (50.0%) | 1 (50.0%) |
| Prior taxane | 1 (16.7%) | 0 (0.0%) |
| Prior response |  |  |
| NE | 3 (50.0%) | 0 (0.0%) |
| NonCR/NonPD | 1 (16.7%) | 0 (0.0%) |
| PR | 0 (0.0%) | 2 (100.0%) |
| SD | 1 (16.7%) | 0 (0.0%) |
| unknown | 1 (16.7%) | 0 (0.0%) |
| RAM infusions |  |  |
| ≥3 | 6 (100.0%) | 2 (100.0%) |
| Pleural effusion | 6 (100.0%) | 0 (0.0%) |
| Edema | 2 (33.3%) | 0 (0.0%) |
| Proteinuria | 3 (50.0%) | 0 (0.0%) |
| Albumin (g/dl) | 3.85 (±0.55) | 4.45 (±0.35) |
| C reactive protein (mg/dl) | 0.06 (0.04-0.18) | 0.69 (0.53-0.84) |
| Modified Glasgow prognostic score | 1 (16.7%) | 2 (100.0%) |
| Cachexia | 1 (16.7%) | 1 (50.0%) |
